# Supplementary material for: The impact of mental and somatic stressors on physical activity and sedentary behaviour in adults with type 2 diabetes mellitus: a diary study
Source: PeerJ journal article supplement (doi:10.7717/peerj.11579), 2021-06-18
Supplement: Data_and_scriptredacted.zip [file Data_and_scriptredacted.zip]

## Sheet: Blad1
Dataset	Variable	type	label	(if categorical) values	(if categorical) meaning of values
baseline_info_wide_format	ID	string variable	ID of the participant
baseline_info_wide_format	age	continuous	Age of the participant
baseline_info_wide_format	gender	categorical	Sex of the participant	0	man
				1	woman
baseline_info_wide_format	civil_state	categorical	Civil state of the participant	1	single
				2	married/cohabiting
				3	divorced
				4	widowhood
baseline_info_wide_format	Education	categorical	Education level of the participant	1	primary education
				2	secondary education (lower)
				3	secondary education (higher)
				4	college
				5	university
baseline_info_wide_format	BMI	continuous	Body mass index of the participant
baseline_info_wide_format	Occupation	string variable	Occupation of the participant
baseline_info_wide_format	Retired	categorical	Whether or not participant is retired	0	not retired
				1	retired
baseline_info_wide_format	Length	continuous	Length of the participant (in cm)
baseline_info_wide_format	Time_diagnosis	continuous	Time since diagnosis of T2DM (in months)
baseline_info_wide_format	Weight	continuous	Weight of the participant (in kg)
baseline_info_wide_format	waist_circumference	continuous	Waist circumference (in cm)
baseline_info_wide_format	promis_anxiety_total	continuous	Total score on the PROMIS anxiety scale
baseline_info_wide_format	promis_depression_total	continuous	Total score on the PROMIS depression scale
data_diary_long	ID	string variable	ID of the participant
data_diary_long	Age	continuous	Age of the participant
data_diary_long	Gender	categorical	Sex of the participant	0	man
				1	woman
data_diary_long	Civil_state	categorical	Civil state of the participant	1	single
				2	married/cohabiting
				3	divorced
				4	widowhood
data_diary_long	Education	categorical	Education level of the participant	1	primary education
				2	secondary education (lower)
				3	secondary education (higher)
				4	college
				5	university
data_diary_long	BMI	continuous	Body mass index of the participant
data_diary_long	waist_circumference	continuous	Waist circumference (in cm)
data_diary_long	Time_diagnosis	continuous	Time since diagnosis of T2DM (in months)
data_diary_long	data_pretest	string variable	Date on which the pretest was performed
data_diary_long	weekday_cat	categorical	Day of the week on which the pretest was performed	1	Monday
				2	Tuesday
				3	Wednesday
				4	Thursday
				5	Friday
				6	Saturday
				7	Sunday
data_diary_long	time_morning_ok	categorical	Correct timing of filling out the diary	0	not OK
				1	OK
data_diary_long	Day_adapted	categorical	Daynumber	1	day 1 of filling out the diary
				2	day 2 of filling out the diary
				3	day 3 of filling out the diary
				4	day 4 of filling out the diary
				5	day 5 of filling out the diary
				6	day 6 of filling out the diary
				7	day 7 of filling out the diary
				8	day 8 of filling out the diary
				9	day 9 of filling out the diary
				10	day 10 of filling out the diary
data_diary_long	tired	continuous	Participants score on the item measuring tiredness
data_diary_long	tension_stress	continuous	Participants score on the item measuring tension/stress
data_diary_long	pain	continuous	Participants score on the item measuring pain
data_diary_long	nausea_dizziness	continuous	Participants score on the item measuring nausea/dizziness
data_diary_long	numbness	continuous	Participants score on the item measuring numbness/tingling
data_diary_long	sadness	continuous	Participants score on the item measuring sadness
data_diary_long	Freedson_sedentary	continuous	Minutes spent sitting (Freedson cutpoints)
data_diary_long	Freedson_light	continuous	Minutes spent in LPA (Freedson cutpoints)
data_diary_long	Freedson_moderate	continuous	Minutes spent in moderate PA (Freedson cutpoints)
data_diary_long	Freedson_vigorous	continuous	Minutes spent in vigorous PA (Freedson cutpoints)
data_diary_long	Freedson_mvpa	continuous	Minutes spent in MVPA (Freedson cutpoints)
data_diary_long	Barrett_sedentary	continuous	Minutes spent sitting (Barrett cutpoints)
data_diary_long	Barrett_light	continuous	Minutes spent in LPA (Barrett cutpoints)
data_diary_long	Barrett_mvpa	continuous	Minutes spent in MVPA (Barrett cutpoints)
